# Supplementary material
Source: publisher site journal article supplement (https://www.dovepress.com/article/285233)
Supplement: Supplementary file 1 [file get_supplementary_file.php]

# Selenium Nanoparticles by moderating oxidative stress promote differentiation of mesenchymal stem cells to osteoblasts

# Sabiha Fatima1*, Rawan Alfrayh1, May Alrashed2, Sarah Alsobaie1, Rehan Ahmad3, Amer Mahmood4*

**Supplementary Table 1: Real-Time PCR primer sequences used in this study**

| Gene | Forward | Reverse |
| --- | --- | --- |
| ALP | GACGGACCCTCGCCAGTGCT | AATCGACGTGGGTGGGAGGGG |
| RUNX2 | CACCATGTCAGCAAAACTTCTT | ACCTTTGCTGGACTCTGCAC |
| COL1a1 | TGACGAGACCAAGAACTG | CCATCCAAACCACTGAAACC |
| OCN | GGCAGCGAGGTAGTGAAGAG | CTCACACACCTCCCTCCTG |
| OPN | cagttcagaagaggagg | tcagcctcagagtcttcatc |
| CDH11 | TCTGTATCAGAAGCAGCTGTC | TCCTGGTCATCTGCACTAAC |
| SPARC | CCTGGGAGAGGACAGAAAACA | TGTCTAGAAGGCTTTGGGTTGT |
| PPARγ | TGGAGACCGCCCAGGTTTGC | AGCTGGGAGGACTCGGGGTG |
| C/EBPα | TGCGCAAGAGCCGGGACAAG | AGCTGGGAGGACTCGGGGTG |
| P38 | AGATGCCGAAGATGAACTTTCG | GGTCAGGCTCTTCCATTCGT |
| JNK | TCCAGCACCCGTACATCAAC | TCTTAGTTCGCTCCTCCAAAT |
| ERK | TTAACACGGTGGACGAGTGG | GACGCGACGTCAAAGGAGGT |
| FoxO3 | GCACCAATTCTAACGCCAGCAC | ATCCAGCAGGTCGTCCATGAGG |
| GAPDH | CTGGTAAAGTGGATATTGTTGCCT | TGGAATCATATTGGAACATGTAAACC |
